# Supplementary material for: Activation of PPARα Ameliorates Cardiac Fibrosis in Dsg2-Deficient Arrhythmogenic Cardiomyopathy
Source: MDPI journal article supplement (doi:10.3390/cells11203184), 2022-10-11
Supplement: s1 [file s1]

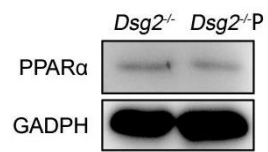

**Figure S1.** The expression of PPARα in the skeletal muscle of cardiac specific DSG2 null mice received with AAV9-cTnT-GFP (DSG2<sup>-/-</sup>) or AAV9-cTnT-Ppara (DSG2<sup>-/-</sup> P)
